# Supplementary material
Source: publisher figshare collection journal article supplement (https://frontiersin.figshare.com/ndownloader/files/28286307)
Supplement: Supplementary file 1 [file 28286307]

## Sheet: Sheet1
	S. alucia sp. nov.	S. nadir sp. nov.	S. alphadelphini sp. nov.	S. alphacrucis sp. nov.	S. yokosuka sp. nov.	S. ungava sp. nov.	Sirsoe sp. A	Sirsoe sp. 'BioSuOr'	S. besnard sp. nov.	S. maximiano sp. nov.	S. sirikos	S. ypupiara sp. nov.	S. pirapuan sp. nov.	S. balanophila clade-2	S. balaenophila	S. ahabi	S. falenothiras	S. ketea	S. methanicola	S. dalailamai	S. munki
S. alucia sp. nov.	0.025 - 0.001	0.162	0.161	0.167	0.148	0.165	0.154	0.172	0.153	0.11	0.11	0.146	0.145	0.145	0.143	0.152	0.16	0.164	0.123	0.096	0.089
S. nadir sp. nov.	0.225	0.024 - 0.009	0.075	0.065	0.047	0.107	0.1	0.126	0.057	0.121	0.123	0.06	0.057	0.055	0.06	0.093	0.104	0.109	0.109	0.1	0.1
S. alphadelphini sp. nov.	0.209	0.189	-	0.063	0.045	0.111	0.116	0.133	0.04	0.13	0.13	0.062	0.062	0.066	0.067	0.1	0.111	0.114	0.109	0.1	0.102
S. alphacrucis sp. nov.	0.225	0.197	0.176	0.010 - 0.002	0.024	0.095	0.108	0.12	0.043	0.132	0.13	0.056	0.053	0.051	0.056	0.089	0.1	0.094	0.106	0.108	0.103
S. yokosuka sp. nov.	0.208	0.181	0.163	0.112	0 - 0.004	0.085	0.09	0.104	0.021	0.109	0.107	0.031	0.033	0.026	0.031	0.073	0.083	0.076	0.09	0.1	0.095
S. ungava sp. nov.	0.23	0.176	0.186	0.153	0.148	-	0.057	0.069	0.095	0.118	0.116	0.085	0.083	0.09	0.088	0.052	0.04	0.043	0.118	0.124	0.107
Sirsoe sp. A	0.222	0.191	0.2	0.195	0.173	0.165	-	0.05	0.095	0.107	0.104	0.095	0.092	0.095	0.095	0.04	0.062	0.059	0.114	0.121	0.102
Sirsoe sp. 'BioSuOr'	0.212	0.189	0.188	0.174	0.159	0.168	0.15	-	0.107	0.118	0.114	0.111	0.111	0.111	0.112	0.055	0.073	0.071	0.123	0.124	0.112
S. besnard sp. nov.	0.228	0.182	0.161	0.185	0.171	0.198	0.186	0.2	-	0.116	0.109	0.043	0.043	0.043	0.048	0.076	0.09	0.097	0.097	0.102	0.1
S. maximiano sp. nov.	0.205	0.215	0.205	0.189	0.203	0.203	0.212	0.195	0.234	0 - 0.001	0.007	0.11	0.111	0.109	0.105	0.109	0.114	0.116	0.055	0.056	0.057
S. sirikos	0.215	0.203	0.189	0.181	0.201	0.191	0.203	0.207	0.227	0.077	0 - 0.029	0.107	0.109	0.107	0.102	0.102	0.111	0.114	0.055	0.05	0.052
S. ypupiara sp. nov.	0.218	0.196	0.166	0.166	0.144	0.168	0.182	0.177	0.183	0.212	0.201	0.001 - 0.003	0.005	0.005	0.003	0.09	0.088	0.091	0.1	0.103	0.095
S. pirapuan sp. nov.	0.219	0.177	0.165	0.156	0.141	0.16	0.164	0.162	0.182	0.197	0.19	0.061	0 - 0.002	0.007	0.005	0.09	0.088	0.09	0.095	0.102	0.095
S. balanophila clade-2	0.217	0.18	0.161	0.16	0.142	0.162	0.179	0.174	0.178	0.211	0.195	0.075	0.059	0 - 0.003	0.005	0.09	0.088	0.09	0.1	0.102	0.095
S. balaenophila	0.2	0.175	0.163	0.144	0.131	0.158	0.168	0.164	0.184	0.2	0.19	0.076	0.065	0.079	0 - 0.011	0.09	0.09	0.092	0.1	0.098	0.09
S. ahabi	0.216	0.189	0.171	0.178	0.154	0.17	0.156	0.159	0.181	0.2	0.2	0.162	0.16	0.155	0.16	-	0.043	0.047	0.104	0.112	0.095
S. falenothiras	0.229	0.197	0.193	0.171	0.165	0.107	0.166	0.154	0.197	0.195	0.187	0.186	0.183	0.181	0.172	0.169	-	0.038	0.126	0.121	0.114
S. ketea	0.229	0.199	0.204	0.198	0.177	0.144	0.179	0.185	0.197	0.21	0.219	0.188	0.185	0.181	0.176	0.181	0.149	-	0.121	0.131	0.112
S. methanicola	0.212	0.217	0.216	0.217	0.23	0.198	0.221	0.209	0.238	0.154	0.156	0.213	0.205	0.21	0.203	0.226	0.197	0.203	-	0.024	0.045
S.dalailamai	0.194	0.209	0.213	0.186	0.193	0.181	0.196	0.201	0.184	0.158	0.156	0.213	0.198	0.199	0.201	0.202	0.204	0.222	0.11	- 0.001	0.05
S. munki	0.222	0.237	0.235	0.199	0.222	0.206	0.229	0.218	0.201	0.154	0.146	0.211	0.198	0.208	0.207	0.228	0.21	0.224	0.137	0.136	- 0.002
Suppl. Table 1 - Average of uncorrected genetic distance (p-distance) among Sirsoe species. Values above the diagonal are interspecific 16S distances and below are COI distance. Diagonal values (in bold) are intraspecific distances: top values for 16S and inferior for COI. Dark red and green represent high values and light colors low values.
